# Supplementary material for: Ideal two-dimensional quantum spin Hall insulators MgA2Te4 (A = Ga, In) with Rashba spin splitting and tunable properties
Source: Royal Society of Chemistry journal article supplement (doi:10.1039/d3cp04898e), 2024-01-01
Supplement: d3cp04898e1.pdf [file d3cp04898e1.pdf]

## Supplementary material

**Table.S1**

The elastic constants  $C_{ij}$ , the Young's modulus Y2D and Poisson's ratios  $\nu$  of  $\text{MgGa}_2\text{Te}_4$ ,  $\text{MgIn}_2\text{Te}_4$

|                            | $C_{11}(\text{N/m})$ | $C_{12}(\text{N/m})$ | $C_{66}(\text{N/m})$ | Y2D(N/m) | $\nu$ |
|----------------------------|----------------------|----------------------|----------------------|----------|-------|
| $\text{MgGa}_2\text{Te}_4$ | 81.162               | 27.834               | 26.664               | 71.617   | 0.343 |
| $\text{MgIn}_2\text{Te}_4$ | 69.449               | 24.198               | 22.625               | 61.017   | 0.348 |
